# Supplementary material for: Pregnancy has a minimal impact on the acute transcriptional signature to vaccination
Source: PubMed Central journal article supplement (PMC7096498; doi:10.1038/s41541-020-0177-6), 2020-03-25
Supplement: 41541_2020_177_MOESM1_ESM.pdf [file 41541_2020_177_MOESM1_ESM.pdf]

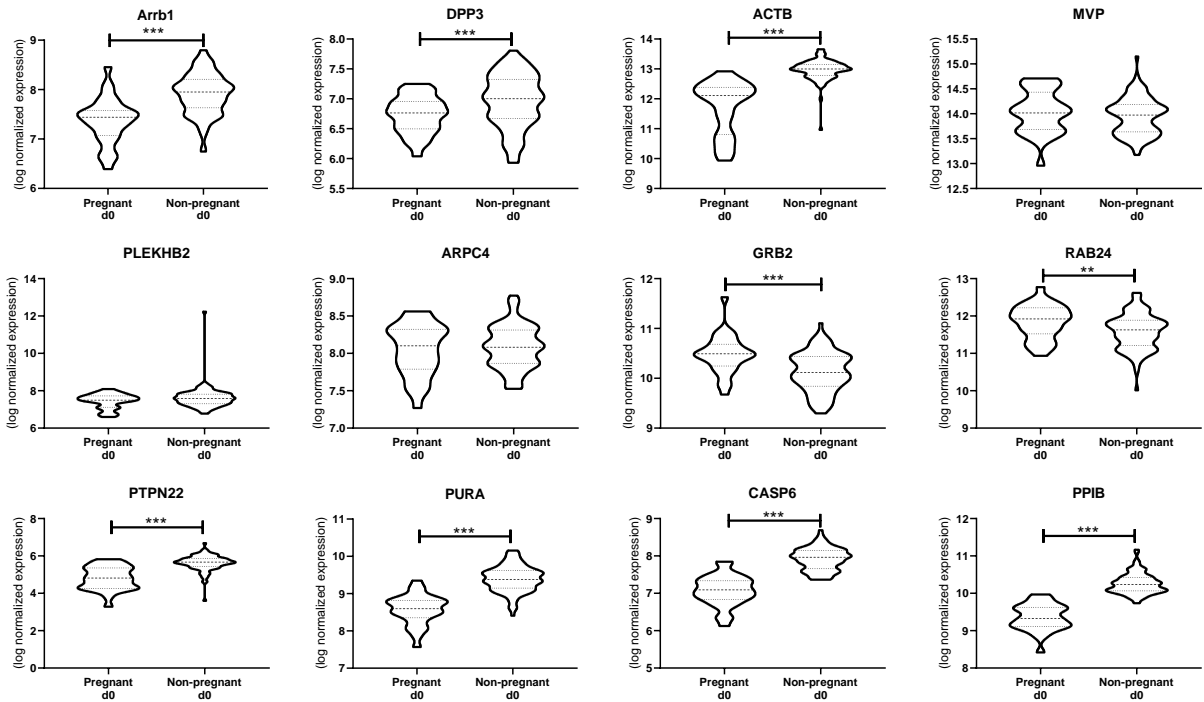

**Supplementary figure 1. Effect of pregnancy on expression of potential marker genes.** Individual differentially expressed genes, thick dashed line represents median, thin lines represent quartiles.
